# Supplementary material for: Blood miRNA levels associated with ADHD traits in children across six European birth cohorts
Source: PubMed Central journal article supplement (PMC10521440; doi:10.1186/s12888-023-05199-5), 2023-09-25
Supplement: 12888_2023_5199_MOESM2_ESM.pdf [file 12888_2023_5199_MOESM2_ESM.pdf]

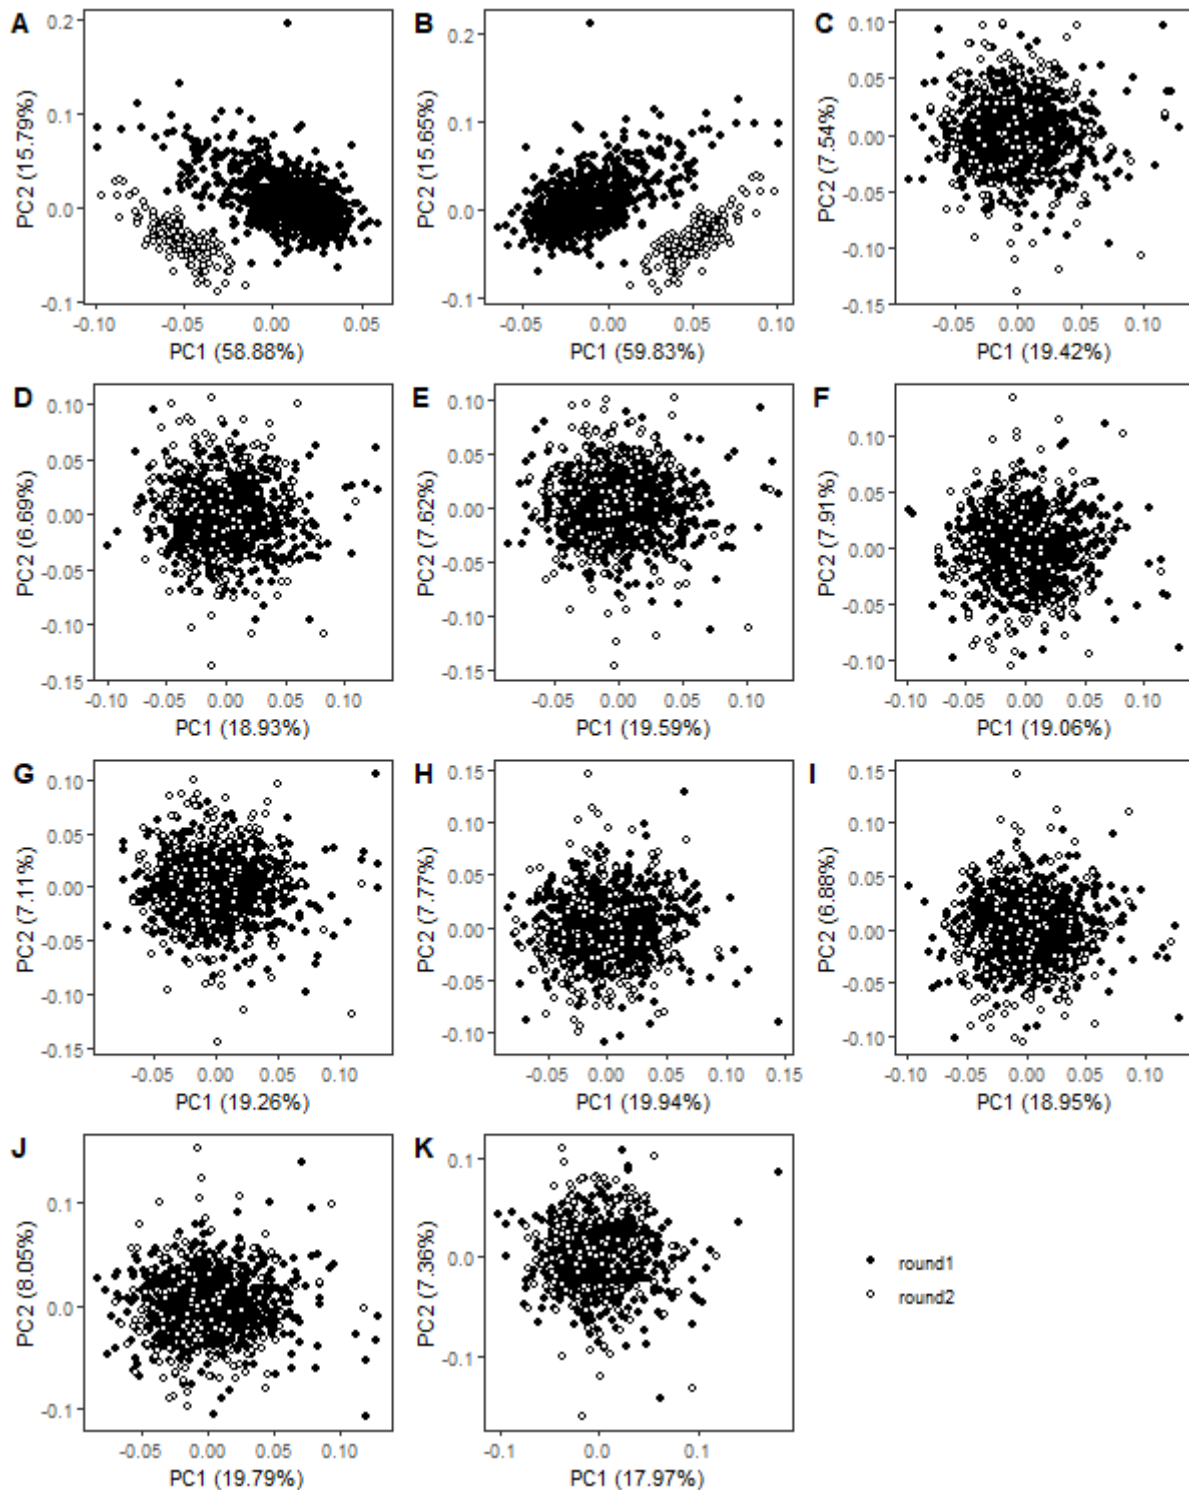

**Fig. S1. PCA (principal component analysis) before and after SVA (surrogate variable analysis).** Showing effect of SVA correction on laboratory processing round. PCA before SVA for (A) dataset N=1089 and (B) dataset N=894. PCA after SVA for (C) Conner's ADHD index, (D) Conner's hyperactivity, (E) Conner's inattention, (F) CBCL ADHD problems, (G) ANT HRT-SE, (H) ANT zeros, (I) ANT omissions, (J) ANT conflict, and (K) N-back  $d'$ .

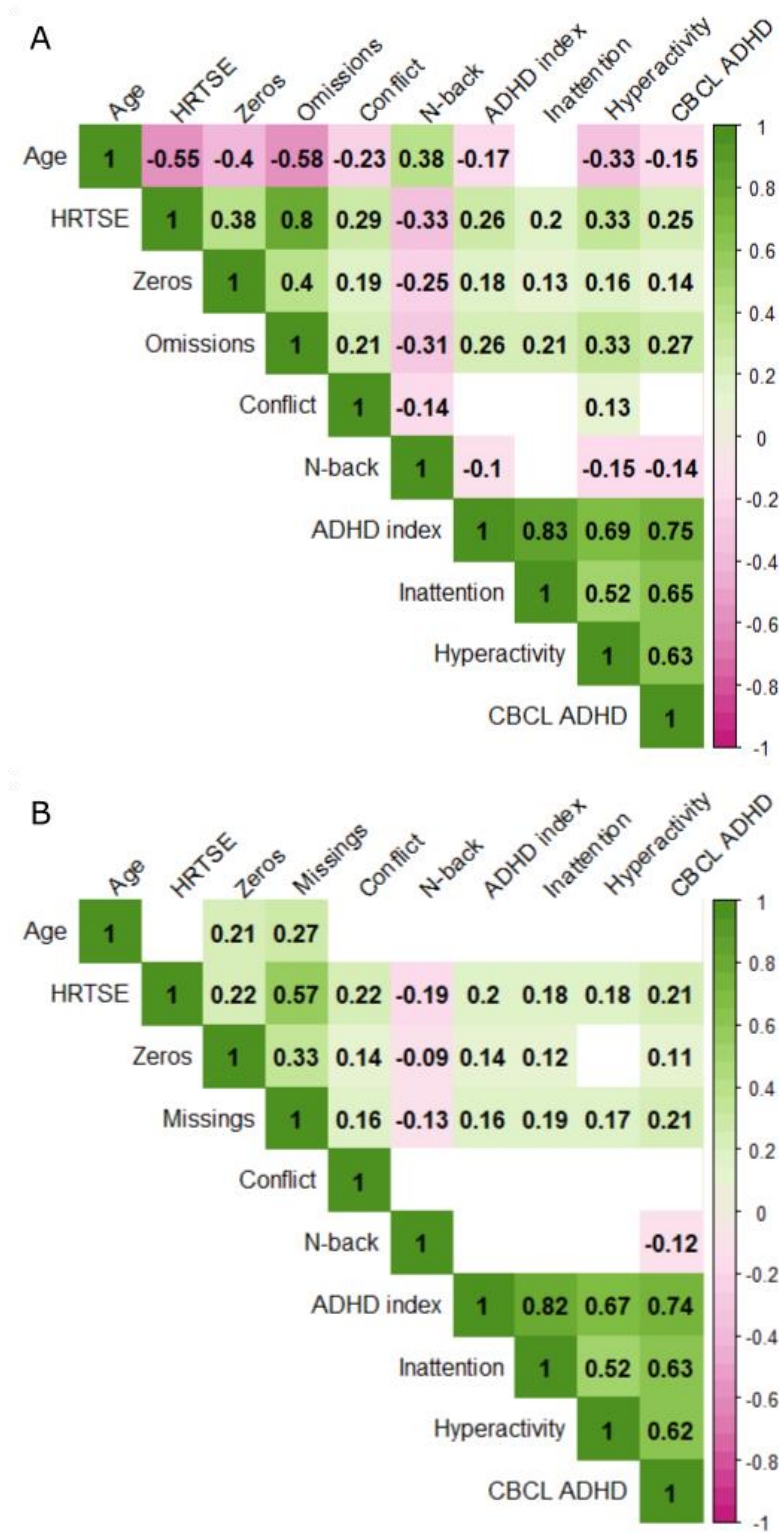

**Fig. S2. Correlation matrix for bivariate association between measures of behavior and neuropsychological functions and child's age.** Spearman rank correlation coefficient is presented. Analysis performed (A) prior to, and (B) after, age-adjusting and transforming measures of behavior and neuropsychological functions. A blank square indicates no statistical significance, with a significance level of 0.01. Positive correlations are green and negative correlations are pink, and the intensity of colors is proportional with the correlation coefficient.

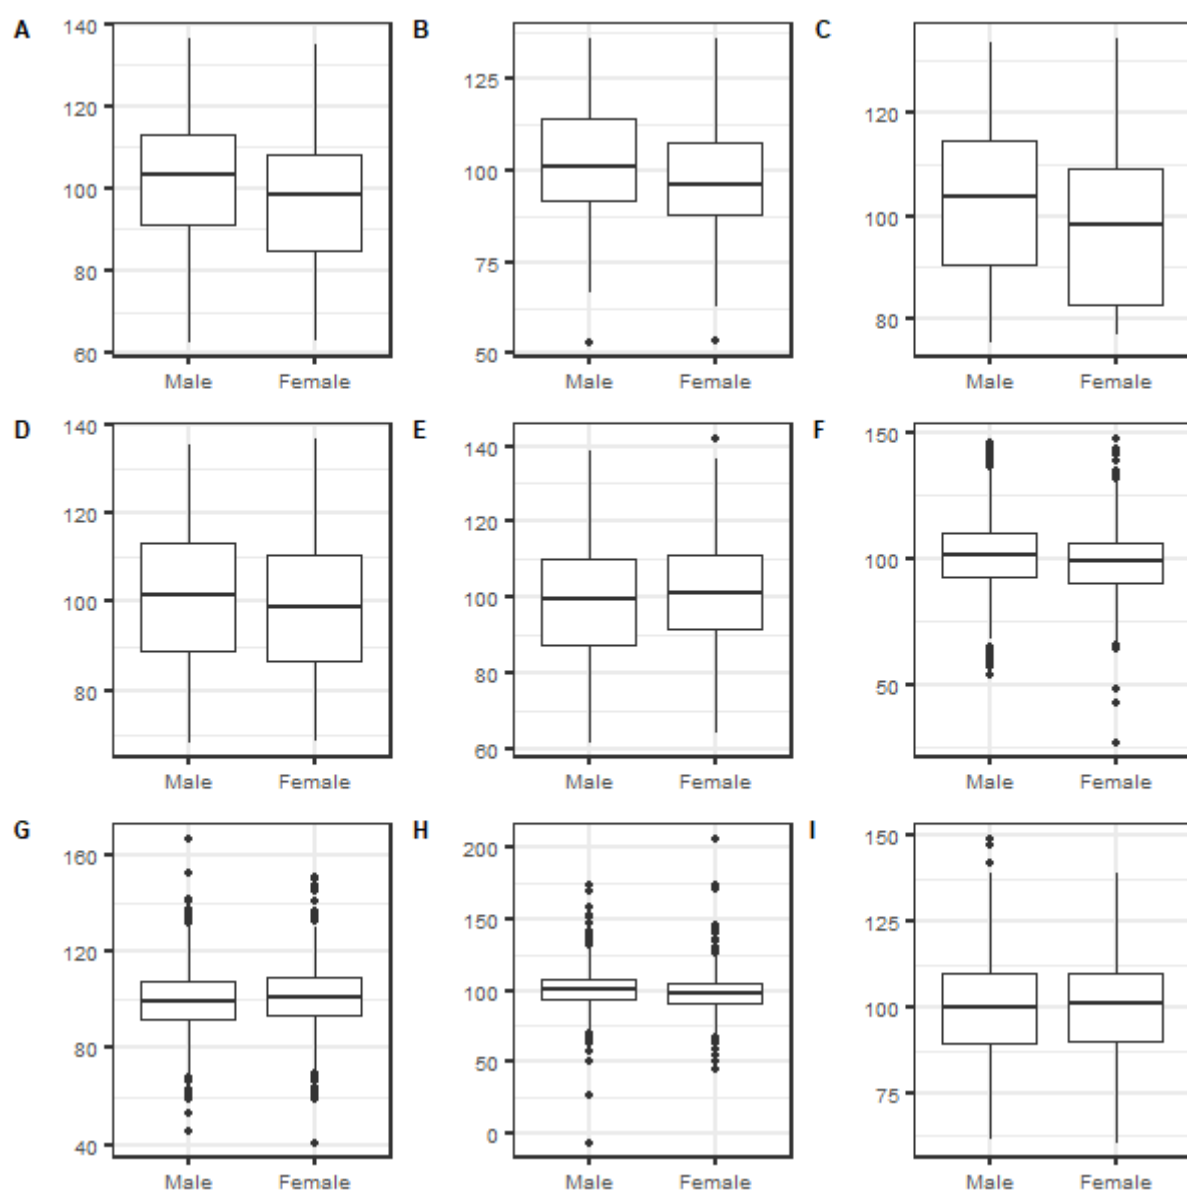

**Fig. S3. Behavioral and neuropsychological scores by sex.** (A) Conner's ADHD index, (B) Conner's hyperactivity, (C) Conner's inattention, (D) CBCL ADHD problems, (E) ANT HRT-SE, (F) ANT zeros, (G) ANT omissions, (H) ANT conflict, and (I) N-back  $d'$ .
