# Supplementary material for: Blood miRNA levels associated with ADHD traits in children across six European birth cohorts
Source: PubMed Central journal article supplement (PMC10521440; doi:10.1186/s12888-023-05199-5), 2023-09-25
Supplement: 12888_2023_5199_MOESM3_ESM.pdf [file 12888_2023_5199_MOESM3_ESM.pdf]

**Table S1. Change in number of miRNAs significantly differentially expressed after sensitivity analyses.**

|               |                  | ANT    |       |           |          | N-back    | Conner's   |             |               | CBCL | New significant miRNAs                                                |
|---------------|------------------|--------|-------|-----------|----------|-----------|------------|-------------|---------------|------|-----------------------------------------------------------------------|
|               |                  | HRT-SE | Zeros | Omissions | Conflict | 3 numbers | ADHD Index | Inattention | Hyperactivity | ADHD |                                                                       |
| <b>Sex</b>    | Each separately: |        |       |           |          |           |            |             |               |      |                                                                       |
|               | <b>Female</b>    |        |       |           |          |           |            | 0           | 0             |      |                                                                       |
|               | <b>Male</b>      |        |       |           |          |           |            | 1D, 1UP     | 4D            |      |                                                                       |
| <b>SES</b>    | (as covariate)   |        |       |           |          |           |            | 1D, 2UP     | 26D           |      |                                                                       |
| <b>Cohort</b> | One removed:     |        |       |           |          |           |            |             |               |      |                                                                       |
|               | <b>BIB</b>       |        |       |           |          |           |            | 0           | 15D           |      | Hyper.: miR-378a-3p                                                   |
|               | <b>EDEN</b>      |        |       |           |          |           |            | 1D          | 28D           |      | Hyper.: miR-126-3p, 425-5p, 15a-5p, 199a-3p                           |
|               | <b>INMA</b>      |        |       |           | 1D       |           |            | 0           | 0             |      | Conflict: miR-6812-5p                                                 |
|               | <b>KANC</b>      |        |       |           |          |           |            | 1D, 5UP     | 16D           | 3UP  | Inatt.: miR-4687-3p, 4788, 7152-3p<br>CBCL: miR-1268b, 4763-3p, 1268a |
|               | <b>MOBA</b>      |        |       |           |          |           |            | 0           | 25D           |      |                                                                       |
|               | <b>RHEA</b>      |        |       |           |          |           |            | 1D, 2UP     | 0             |      |                                                                       |
| <b>Cohort</b> | Each separately: |        |       |           |          |           |            |             |               |      |                                                                       |
|               | <b>BIB</b>       |        |       |           |          |           |            | 0           | 0             |      |                                                                       |
|               | <b>EDEN</b>      |        |       |           |          |           |            | 0           | 0             |      |                                                                       |
|               | <b>INMA</b>      |        |       |           |          |           |            | 0           | 7D            |      | Hyper.: miR-378a-3p                                                   |
|               | <b>KANC</b>      |        |       |           |          |           | 2UP        | 0           | 0             |      | ADHD I.: miR-4749-3p, 6875-5p                                         |
|               | <b>MOBA</b>      |        |       |           |          |           |            | 0           | 0             |      |                                                                       |
|               | <b>RHEA</b>      |        |       |           |          |           |            | 0           | 0             |      |                                                                       |
| <b>Round</b>  | (as covariate)   |        |       |           |          |           |            | 1D, 2UP     | 28D           |      |                                                                       |
| <b>Round</b>  | Each separately: |        |       |           |          |           |            |             |               |      |                                                                       |
|               | <b>Round 1</b>   |        |       |           |          |           | 1UP        | 1UP         | 0             |      | ADHD I.: miR-4443                                                     |
|               | <b>Round 2</b>   |        |       |           |          |           |            | 0           | 0             |      |                                                                       |

D, downregulated; UP, upregulated.

**Table S2. miRNAs linked to ADHD in previous literature.**

| <b>miRNA</b>    | <b>Status in ADHD</b>                                                               | <b>Sample type</b> | <b>References</b> |
|-----------------|-------------------------------------------------------------------------------------|--------------------|-------------------|
| hsa-let-7d      | Upregulated (two studies)                                                           | Serum              | (1, 2)            |
| hsa-let-7d      | Downregulated                                                                       | WB                 | (3)               |
| hsa-let-7g-5p   | ADHD-prediction model                                                               | WBCs               | (4)               |
| hsa-let-7g-5p   | Decreased in patient group responding to MPH treatment                              | WBCs               | (5)               |
| hsa-miR-101-3p  | ADHD-prediction model                                                               | WBCs               | (4)               |
| hsa-miR-101-3p  | Upregulated                                                                         | Serum              | (6)               |
| hsa-miR-101-3p  | Decreased in both responder and non-responder patient group after MPH treatment     | WBCs               | (5)               |
| hsa-miR-106b-5p | Downregulated                                                                       | Serum              | (6)               |
| hsa-miR-106b-5p | Downregulated                                                                       | WB                 | (7)               |
| hsa-miR-107     | Downregulated                                                                       | WB                 | (7)               |
| hsa-miR-124-3p  | Targeting ADHD gene set                                                             | Predicted          | (8)               |
| hsa-miR-125a-3p | Targeting ADHD gene set                                                             | Predicted          | (8)               |
| hsa-miR-126-5p  | ADHD-prediction model                                                               | WBCs               | (4)               |
| hsa-miR-126-5p  | Upregulated                                                                         | WBCs               | (9)               |
| hsa-miR-126-5p  | Decreased in patient group responding to MPH treatment                              | WBCs               | (5)               |
| hsa-miR-129-5p  | Targeting ADHD gene set                                                             | Predicted          | (8)               |
| hsa-miR-130a-3p | Upregulated                                                                         | Serum              | (6)               |
| hsa-miR-132-3p  | Upregulated                                                                         | Plasma             | (10)              |
| hsa-miR-138-5p  | Upregulated                                                                         | Serum              | (6)               |
| hsa-miR-1-3p    | Targeting ADHD gene set                                                             | Predicted          | (8)               |
| hsa-miR-140-3p  | ADHD-prediction model                                                               | WBCs               | (4)               |
| hsa-miR-140-3p  | Upregulated                                                                         | WBCs               | (9)               |
| hsa-miR-140-3p  | Decreased in patient group responding to MPH treatment                              | WBCs               | (5)               |
| hsa-miR-142-3p  | Downregulated in ADHD group when presence of psychiatric disease in their families. | Plasma             | (11)              |
| hsa-miR-142-5p  | ADHD-prediction model                                                               | WBCs               | (4)               |
| hsa-miR-148b-3p | Downregulated                                                                       | WB                 | (12)              |
| hsa-miR-150-5p  | ADHD-prediction model                                                               | WBCs               | (4)               |
| hsa-miR-150-5p  | Increased in patient group not responding to MPH treatment                          | WBCs               | (5)               |
| hsa-miR-151a-3p | ADHD-prediction model                                                               | WBCs               | (4)               |
| hsa-miR-151a-3p | Decreased in patient group responding to MPH treatment                              | WBCs               | (5)               |
| hsa-miR-151a-5p | ADHD-prediction model                                                               | WBCs               | (4)               |

|                 |                                                                                     |           |      |
|-----------------|-------------------------------------------------------------------------------------|-----------|------|
| hsa-miR-151a-5p | Decreased in patient group responding to MPH treatment                              | WBCs      | (5)  |
| hsa-miR-155-5p  | Targeting ADHD gene set                                                             | Predicted | (8)  |
| hsa-miR-155-5p  | Upregulated                                                                         | WB        | (7)  |
| hsa-miR-15a-5p  | Targeting ADHD gene set                                                             | Predicted | (8)  |
| hsa-miR-16-5p   | Targeting ADHD gene set                                                             | Predicted | (8)  |
| hsa-miR-17-5p   | Targeting ADHD gene set                                                             | Predicted | (8)  |
| hsa-miR-185-5p  | Downregulated                                                                       | PBMCs     | (13) |
| hsa-miR-18a-5p  | Downregulated                                                                       | WB        | (7)  |
| hsa-miR-191-5p  | Upregulated                                                                         | PBMCs     | (13) |
| hsa-miR-195-5p  | Upregulated                                                                         | Serum     | (6)  |
| hsa-miR-19a-3p  | Targeting ADHD gene set                                                             | Predicted | (8)  |
| hsa-miR-19b-3p  | Targeting ADHD gene set                                                             | Predicted | (8)  |
| hsa-miR-204-5p  | Targeting ADHD gene set                                                             | Predicted | (8)  |
| hsa-miR-21-5p   | Targeting ADHD gene set                                                             | Predicted | (8)  |
| hsa-miR-223-3p  | ADHD-prediction model                                                               | WBCs      | (4)  |
| hsa-miR-22-3p   | Downregulated                                                                       | WB        | (7)  |
| hsa-miR-22-3p   | Targeting ADHD gene set                                                             | Predicted | (8)  |
| hsa-miR-24-3p   | Downregulated                                                                       | WB        | (7)  |
| hsa-miR-24-3p   | Targeting ADHD gene set                                                             | Predicted | (8)  |
| hsa-miR-26b-5p  | Downregulated                                                                       | PBMCs     | (13) |
| hsa-miR-27a-3p  | ADHD-prediction model                                                               | WBCs      | (4)  |
| hsa-miR-27a-3p  | Decreased in patient group responding to MPH treatment                              | WBCs      | (5)  |
| hsa-miR-30a-5p  | Targeting ADHD gene set                                                             | Predicted | (8)  |
| hsa-miR-30e-5p  | ADHD-prediction model                                                               | WBCs      | (4)  |
| hsa-miR-30e-5p  | Upregulated                                                                         | WBCs      | (9)  |
| hsa-miR-30e-5p  | Decreased in patient group responding to MPH treatment                              | WBCs      | (5)  |
| hsa-miR-335-5p  | Targeting ADHD gene set                                                             | Predicted | (8)  |
| hsa-miR-34a-5p  | Targeting ADHD gene set                                                             | Predicted | (8)  |
| hsa-miR-34c-3p  | Upregulated                                                                         | PBMCs     | (14) |
| hsa-miR-378a-5p | Downregulated in ADHD group when presence of psychiatric disease in their families. | Plasma    | (11) |
| hsa-miR-4281    | ADHD-prediction model + downregulated. Increased after 12-week MPH treatment.       | Serum     | (15) |
| hsa-miR-4466    | ADHD-prediction model + upregulated. Decreased after 12-week MPH treatment.         | Serum     | (15) |
| hsa-miR-4516    | ADHD-prediction model + downregulated. Increased after 12-week MPH treatment.       | Serum     | (15) |

|                 |                                                                               |           |      |
|-----------------|-------------------------------------------------------------------------------|-----------|------|
| hsa-miR-4763-3p | ADHD-prediction model + downregulated. Increased after 12-week MPH treatment. | Serum     | (15) |
| hsa-miR-486-5p  | ADHD-prediction model                                                         | WBCs      | (4)  |
| hsa-miR-486-5p  | Decreased in patient group responding to MPH treatment                        | WBCs      | (5)  |
| hsa-miR-5692b   | Upregulated                                                                   | WB        | (3)  |
| hsa-miR-6090    | ADHD-prediction model + downregulated. Increased after 12-week MPH treatment. | Serum     | (15) |
| hsa-miR-616-5p  | Targeting ADHD gene set                                                       | Predicted | (8)  |
| hsa-miR-652-3p  | Upregulated                                                                   | WB        | (12) |
| hsa-miR-92a-3p  | ADHD-prediction model                                                         | WBCs      | (4)  |
| hsa-miR-942-5p  | Upregulated                                                                   | WB        | (12) |
| hsa-miR-9-5p    | Targeting ADHD gene set                                                       | Predicted | (8)  |
| hsa-miR-96-5p   | Targeting ADHD gene set                                                       | Predicted | (8)  |

WB, whole blood; WBCs, white blood cells; PBMCs, peripheral blood mononuclear cells; MPH, methylphenidate.

**Table S3. Functional enrichment analysis of 29 miRNAs significantly associated with hyperactivity.**

| <b>KEGG pathway</b>                                      | <b>#miRNAs</b> | <b>#genes</b> | <b>p value</b> |
|----------------------------------------------------------|----------------|---------------|----------------|
| Proteoglycans in cancer                                  | 27             | 159           | 5.36e-22       |
| Viral carcinogenesis                                     | 27             | 157           | 6.46e-15       |
| Renal cell carcinoma                                     | 27             | 60            | 2.71e-11       |
| Hippo signaling pathway                                  | 27             | 114           | 4.86e-11       |
| Protein processing in endoplasmic reticulum              | 27             | 128           | 7.47e-09       |
| ECM-receptor interaction                                 | 25             | 51            | 1.11e-07       |
| Cell cycle                                               | 27             | 97            | 1.11e-07       |
| Ubiquitin mediated proteolysis                           | 27             | 109           | 2.55e-07       |
| Endocytosis                                              | 27             | 152           | 2.92e-07       |
| TGF-beta signaling pathway                               | 27             | 61            | 3.32e-07       |
| Adherens junction                                        | 27             | 61            | 4.08e-07       |
| Estrogen signaling pathway                               | 27             | 74            | 5.94e-07       |
| Hepatitis B                                              | 27             | 104           | 6.86e-07       |
| Glioma                                                   | 26             | 51            | 7.97e-07       |
| Prostate cancer                                          | 27             | 72            | 1.35e-06       |
| Chronic myeloid leukemia                                 | 26             | 60            | 2.07e-06       |
| Fatty acid metabolism                                    | 22             | 33            | 2.99e-06       |
| Thyroid hormone signaling pathway                        | 27             | 88            | 2.99e-06       |
| Signaling pathways regulating pluripotency of stem cells | 27             | 103           | 3.01e-06       |
| Pathways in cancer                                       | 27             | 268           | 3.58e-06       |
| Oocyte meiosis                                           | 27             | 82            | 8.49e-06       |
| Colorectal cancer                                        | 27             | 51            | 1.06e-05       |
| Glycosaminoglycan biosynthesis - keratan sulfate         | 19             | 12            | 1.26e-05       |
| p53 signaling pathway                                    | 27             | 54            | 2.38e-05       |
| Pancreatic cancer                                        | 26             | 52            | 2.69e-05       |
| Bacterial invasion of epithelial cells                   | 26             | 59            | 2.82e-05       |
| N-Glycan biosynthesis                                    | 25             | 37            | 3.60e-05       |

|                                           |    |     |          |
|-------------------------------------------|----|-----|----------|
| FoxO signaling pathway                    | 27 | 98  | 3.73e-05 |
| AMPK signaling pathway                    | 27 | 93  | 5.67e-05 |
| Prion diseases                            | 25 | 21  | 9.46e-05 |
| Bladder cancer                            | 26 | 33  | 9.60e-05 |
| Focal adhesion                            | 27 | 144 | 1.23e-04 |
| Sphingolipid signaling pathway            | 26 | 84  | 1.24e-04 |
| Small cell lung cancer                    | 27 | 66  | 1.26e-04 |
| Endometrial cancer                        | 26 | 42  | 1.31e-04 |
| Thyroid cancer                            | 25 | 24  | 1.33e-04 |
| Non-small cell lung cancer                | 25 | 43  | 2.35e-04 |
| Epstein-Barr virus infection              | 27 | 140 | 2.94e-04 |
| Lysine degradation                        | 26 | 34  | 3.04e-04 |
| ErbB signaling pathway                    | 27 | 64  | 3.28e-04 |
| mTOR signaling pathway                    | 27 | 48  | 4.31e-04 |
| HIF-1 signaling pathway                   | 27 | 79  | 4.58e-04 |
| Other types of O-glycan biosynthesis      | 24 | 20  | 6.03e-04 |
| Transcriptional misregulation in cancer   | 27 | 116 | 8.72e-04 |
| Progesterone-mediated oocyte maturation   | 25 | 65  | 1.50e-03 |
| Toxoplasmosis                             | 27 | 84  | 1.60e-03 |
| HTLV-I infection                          | 27 | 172 | 1.60e-03 |
| Central carbon metabolism in cancer       | 27 | 51  | 1.67e-03 |
| Regulation of actin cytoskeleton          | 27 | 139 | 1.70e-03 |
| TNF signaling pathway                     | 26 | 79  | 1.76e-03 |
| Spliceosome                               | 27 | 92  | 1.97e-03 |
| Neurotrophin signaling pathway            | 27 | 84  | 2.80e-03 |
| Chagas disease (American trypanosomiasis) | 27 | 70  | 3.84e-03 |
| RNA transport                             | 27 | 112 | 4.49e-03 |
| Axon guidance                             | 27 | 85  | 4.49e-03 |
| Acute myeloid leukemia                    | 26 | 43  | 4.87e-03 |
| Insulin signaling pathway                 | 27 | 96  | 4.95e-03 |

---

|                                                            |    |    |          |
|------------------------------------------------------------|----|----|----------|
| Fatty acid degradation                                     | 21 | 25 | 5.18e-03 |
| Prolactin signaling pathway                                | 26 | 51 | 5.24e-03 |
| Wnt signaling pathway                                      | 26 | 91 | 5.25e-03 |
| Fatty acid elongation                                      | 17 | 13 | 5.80e-03 |
| Shigellosis                                                | 25 | 46 | 6.33e-03 |
| Gap junction                                               | 26 | 58 | 7.53e-03 |
| Steroid biosynthesis                                       | 19 | 14 | 7.74e-03 |
| Pathogenic Escherichia coli infection                      | 26 | 41 | 8.92e-03 |
| Inositol phosphate metabolism                              | 27 | 42 | 8.93e-03 |
| Melanoma                                                   | 27 | 49 | 8.93e-03 |
| RNA degradation                                            | 26 | 54 | 9.03e-03 |
| Glycosaminoglycan biosynthesis - heparan sulfate / heparin | 22 | 17 | 1.16e-02 |
| mRNA surveillance pathway                                  | 27 | 65 | 2.97e-02 |
| Platelet activation                                        | 26 | 82 | 3.03e-02 |
| Terpenoid backbone biosynthesis                            | 21 | 16 | 3.19e-02 |
| Fatty acid biosynthesis                                    | 22 | 7  | 3.44e-02 |
| Apoptosis                                                  | 27 | 59 | 4.02e-02 |
| Lysosome                                                   | 25 | 78 | 4.53e-02 |
| Adrenergic signaling in cardiomyocytes                     | 27 | 85 | 4.92e-02 |

---

**Table S4. Functional enrichment analysis of 15 miRNAs associated with hyperactivity/ADHD in this and previous studies.**

| <b>KEGG pathway</b>                                      | <b>#miRNAs</b> | <b>#genes</b> | <b>p value</b> |
|----------------------------------------------------------|----------------|---------------|----------------|
| Proteoglycans in cancer                                  | 14             | 149           | 1.08e-26       |
| Viral carcinogenesis                                     | 14             | 140           | 1.08e-12       |
| Hippo signaling pathway                                  | 14             | 106           | 2.08e-12       |
| Protein processing in endoplasmic reticulum              | 14             | 118           | 3.76e-09       |
| Endocytosis                                              | 14             | 141           | 7.57e-08       |
| Signaling pathways regulating pluripotency of stem cells | 14             | 98            | 1.47e-07       |
| Glioma                                                   | 13             | 48            | 2.53e-07       |
| Adherens junction                                        | 14             | 55            | 2.53e-07       |
| Renal cell carcinoma                                     | 14             | 53            | 3.52e-07       |
| TGF-beta signaling pathway                               | 14             | 56            | 3.66e-07       |
| Cell cycle                                               | 14             | 89            | 4.72e-07       |
| Ubiquitin mediated proteolysis                           | 14             | 99            | 6.56e-07       |
| Thyroid hormone signaling pathway                        | 14             | 82            | 1.04e-06       |
| AMPK signaling pathway                                   | 14             | 89            | 2.16e-06       |
| Bacterial invasion of epithelial cells                   | 14             | 57            | 2.68e-06       |
| Chronic myeloid leukemia                                 | 14             | 55            | 3.45e-06       |
| Pancreatic cancer                                        | 14             | 49            | 4.45e-06       |
| Non-small cell lung cancer                               | 13             | 42            | 1.19e-05       |
| Pathways in cancer                                       | 14             | 240           | 1.60e-05       |
| Sphingolipid signaling pathway                           | 14             | 79            | 1.72e-05       |
| Hepatitis B                                              | 14             | 91            | 1.96e-05       |
| Bladder cancer                                           | 14             | 32            | 1.96e-05       |
| Oocyte meiosis                                           | 14             | 77            | 2.23e-05       |
| Prion diseases                                           | 13             | 18            | 2.66e-05       |
| mTOR signaling pathway                                   | 14             | 47            | 2.91e-05       |
| FoxO signaling pathway                                   | 14             | 90            | 3.41e-05       |
| N-Glycan biosynthesis                                    | 14             | 34            | 4.26e-05       |



|                                                  |    |     |          |
|--------------------------------------------------|----|-----|----------|
| Estrogen signaling pathway                       | 14 | 67  | 4.26e-05 |
| Prostate cancer                                  | 14 | 63  | 4.33e-05 |
| Glycosaminoglycan biosynthesis - keratan sulfate | 12 | 10  | 4.36e-05 |
| p53 signaling pathway                            | 14 | 50  | 4.36e-05 |
| Endometrial cancer                               | 13 | 39  | 1.10e-04 |
| Central carbon metabolism in cancer              | 14 | 48  | 1.33e-04 |
| Insulin signaling pathway                        | 14 | 93  | 1.64e-04 |
| Colorectal cancer                                | 14 | 44  | 1.74e-04 |
| Lysine degradation                               | 14 | 32  | 2.03e-04 |
| RNA transport                                    | 14 | 106 | 2.96e-04 |
| Focal adhesion                                   | 14 | 129 | 3.27e-04 |
| Thyroid cancer                                   | 13 | 22  | 4.61e-04 |
| Small cell lung cancer                           | 14 | 59  | 5.61e-04 |
| Steroid biosynthesis                             | 11 | 14  | 7.23e-04 |
| ECM-receptor interaction                         | 14 | 45  | 7.23e-04 |
| Other types of O-glycan biosynthesis             | 12 | 19  | 7.29e-04 |
| Progesterone-mediated oocyte maturation          | 13 | 60  | 9.75e-04 |
| Shigellosis                                      | 13 | 44  | 9.93e-04 |
| HIF-1 signaling pathway                          | 14 | 71  | 1.00e-03 |
| Fatty acid elongation                            | 10 | 11  | 1.19e-03 |
| Prolactin signaling pathway                      | 13 | 47  | 1.19e-03 |
| Fatty acid metabolism                            | 13 | 29  | 1.54e-03 |
| TNF signaling pathway                            | 13 | 72  | 1.54e-03 |
| Gap junction                                     | 14 | 54  | 1.72e-03 |
| Spliceosome                                      | 14 | 82  | 2.06e-03 |
| Fatty acid biosynthesis                          | 13 | 7   | 2.49e-03 |
| Pathogenic Escherichia coli infection            | 14 | 39  | 2.97e-03 |
| RNA degradation                                  | 14 | 51  | 4.24e-03 |
| ErbB signaling pathway                           | 14 | 56  | 4.37e-03 |
| Neurotrophin signaling pathway                   | 14 | 76  | 4.54e-03 |

|                                                            |    |     |          |
|------------------------------------------------------------|----|-----|----------|
| Regulation of actin cytoskeleton                           | 14 | 123 | 4.66e-03 |
| Axon guidance                                              | 14 | 78  | 5.30e-03 |
| Chagas disease (American trypanosomiasis)                  | 14 | 63  | 5.30e-03 |
| Melanoma                                                   | 14 | 45  | 5.33e-03 |
| Terpenoid backbone biosynthesis                            | 12 | 16  | 5.35e-03 |
| Wnt signaling pathway                                      | 14 | 81  | 5.53e-03 |
| Transcriptional misregulation in cancer                    | 14 | 100 | 6.98e-03 |
| mRNA surveillance pathway                                  | 14 | 61  | 7.36e-03 |
| Glycosaminoglycan biosynthesis - heparan sulfate / heparin | 14 | 15  | 9.11e-03 |
| HTLV-I infection                                           | 14 | 150 | 1.27e-02 |
| Lysosome                                                   | 14 | 73  | 1.49e-02 |
| Adrenergic signaling in cardiomyocytes                     | 14 | 76  | 1.49e-02 |
| Platelet activation                                        | 13 | 75  | 1.69e-02 |
| VEGF signaling pathway                                     | 13 | 40  | 1.92e-02 |
| Inositol phosphate metabolism                              | 14 | 38  | 1.92e-02 |
| Acute myeloid leukemia                                     | 13 | 37  | 2.09e-02 |
| Circadian rhythm                                           | 13 | 22  | 2.54e-02 |
| Epstein-Barr virus infection                               | 14 | 117 | 2.84e-02 |
| Toxoplasmosis                                              | 14 | 70  | 3.50e-02 |
| Non-alcoholic fatty liver disease (NAFLD)                  | 14 | 85  | 4.23e-02 |
| Vitamin B6 metabolism                                      | 3  | 5   | 4.57e-02 |
| Vasopressin-regulated water reabsorption                   | 14 | 32  | 4.82e-02 |

**Table S5. MiRNAs statistically significant for Conner’s hyperactivity or inattention score, and their previous associations with neurodevelopmental or psychiatric phenotypes.**

| ADHD-trait           | miRNA           | ADHD | ASD | SZ | MDD | BD | References                                      |
|----------------------|-----------------|------|-----|----|-----|----|-------------------------------------------------|
| <b>Hyperactivity</b> |                 |      |     |    |     |    |                                                 |
|                      | hsa-let-7c-5p   |      |     |    | ✓   |    | MDD (16)                                        |
|                      | hsa-let-7i-5p   |      |     |    |     |    |                                                 |
|                      | hsa-miR-101-3p  | ✓    | ✓   |    | ✓   |    | ADHD (4, 6), ASD (17), MDD (18, 19)             |
|                      | hsa-miR-103a-3p |      | ✓   |    |     |    | ASD (20)                                        |
|                      | hsa-miR-106b-5p | ✓    | ✓   | ✓  |     | ✓  | ADHD (6, 7), ASD (21), SZ (22, 23), BD (24, 25) |
|                      | hsa-miR-107     | ✓    | ✓   | ✓  | ✓   | ✓  | ADHD (7), ASD (26), SZ (24), MDD (24), BD (25)  |
|                      | hsa-miR-130a-3p | ✓    | ✓   | ✓  |     |    | ADHD (6), ASD (17), SZ (22)                     |
|                      | hsa-miR-140-3p  | ✓    | ✓   |    |     | ✓  | ADHD (4, 9), ASD (27), BD (19)                  |
|                      | hsa-miR-142-3p  | ✓    | ✓   |    | ✓   | ✓  | ADHD (11), ASD (26), MDD (24), BD (28)          |
|                      | hsa-miR-144-3p  |      | ✓   |    |     |    | ASD (29)                                        |
|                      | hsa-miR-146b-5p |      | ✓   | ✓  |     |    | ASD (26, 30), SZ (31)                           |
|                      | hsa-miR-148b-3p | ✓    | ✓   | ✓  |     |    | ADHD (12), ASD (26), SZ (22)                    |
|                      | hsa-miR-150-5p  | ✓    | ✓   | ✓  |     |    | ADHD (4), ASD (32), SZ (24)                     |
|                      | hsa-miR-181a-5p |      | ✓   | ✓  |     |    | ASD (26), SZ (22)                               |
|                      | hsa-miR-181b-5p |      | ✓   | ✓  |     |    | ASD (26), SZ (19, 33, 34)                       |
|                      | hsa-miR-186-5p  |      | ✓   | ✓  |     | ✓  | ASD (26), SZ (35), BD (35)                      |
|                      | hsa-miR-19a-3p  | ✓    | ✓   |    | ✓   |    | ADHD (8), ASD (26, 32), MDD (36)                |
|                      | hsa-miR-19b-3p  | ✓    | ✓   | ✓  | ✓   | ✓  | ADHD (8), ASD (26), SZ (37), MDD (38), BD (39)  |
|                      | hsa-miR-24-3p   | ✓    |     | ✓  | ✓   |    | ADHD (7, 8), SZ (22), MDD (19)                  |
|                      | hsa-miR-27a-3p  | ✓    | ✓   | ✓  |     |    | ADHD (4), ASD (26), SZ (22)                     |
|                      | hsa-miR-29a-3p  |      | ✓   | ✓  |     | ✓  | ASD (40), SZ (41), BD (24, 25)                  |
|                      | hsa-miR-29b-3p  |      | ✓   | ✓  |     |    | ASD (26), SZ (22)                               |
|                      | hsa-miR-29c-3p  |      |     | ✓  |     | ✓  | SZ (24), BD (24)                                |
|                      | hsa-miR-30e-5p  | ✓    | ✓   | ✓  |     |    | ADHD (4, 9), ASD (21), SZ (19)                  |
|                      | hsa-miR-324-5p  |      |     |    |     |    |                                                 |

|                    |                 |   |   |   |   |                                           |
|--------------------|-----------------|---|---|---|---|-------------------------------------------|
|                    | hsa-miR-342-5p  |   |   |   | ✓ | MDD (19)                                  |
|                    | hsa-miR-378i    |   |   |   |   |                                           |
|                    | hsa-miR-92a-3p  | ✓ | ✓ | ✓ | ✓ | ADHD (4), ASD (26), SZ (42, 43), MDD (19) |
|                    | hsa-miR-942-5p  | ✓ |   |   |   | ADHD (12)                                 |
| <b>Inattention</b> |                 |   |   |   |   |                                           |
|                    | hsa-miR-3180-3p |   |   |   |   |                                           |
|                    | hsa-miR-4257    |   |   |   |   |                                           |
|                    | hsa-miR-4443    |   |   |   | ✓ | ASD (26)                                  |

Not an exhaustive list. ADHD, attention-deficit/hyperactivity disorder; ASD, autism spectrum disorder; SZ, schizophrenia; MDD, major depression disorder; BD: bipolar disorder.

## References

1. Cao P, Wang L, Cheng Q, Sun X, Kang Q, Dai L, et al. Changes in serum miRNA-let-7 level in children with attention deficit hyperactivity disorder treated by repetitive transcranial magnetic stimulation or atomoxetine: An exploratory trial. *Psychiatry Res.* 2019;274:189-94.
2. Wu LH, Peng M, Yu M, Zhao QL, Li C, Jin YT, et al. Circulating MicroRNA Let-7d in Attention-Deficit/Hyperactivity Disorder. *Neuromolecular Med.* 2015;17(2):137-46.
3. Aydın SU, Kabukcu Basay B, Cetin GO, Gungor Aydın A, Tepeli E. Altered microRNA 5692b and microRNA let-7d expression levels in children and adolescents with attention deficit hyperactivity disorder. *J Psychiatr Res.* 2019;115:158-64.
4. Wang LJ, Li SC, Lee MJ, Chou MC, Chou WJ, Lee SY, et al. Blood-Bourne MicroRNA Biomarker Evaluation in Attention-Deficit/Hyperactivity Disorder of Han Chinese Individuals: An Exploratory Study. *Front Psychiatry.* 2018;9:227.
5. Wang L-J, Kuo H-C, Lee S-Y, Huang L-H, Lin Y, Lin P-H, et al. MicroRNAs serve as prediction and treatment-response biomarkers of attention-deficit/hyperactivity disorder and promote the differentiation of neuronal cells by repressing the apoptosis pathway. *Transl Psychiatry.* 2022;12(1).
6. Zadehbagheri F, Hosseini E, Bagheri-Hosseinabadi Z, Rekadarkolaei HM, Sadeghi I. Profiling of miRNAs in serum of children with attention-deficit hyperactivity disorder shows significant alterations. *J Psychiatr Res.* 2019;109:185-92.
7. Kandemir H, Erdal ME, Selek S, Ay OI, Karababa IF, Kandemir SB, et al. Evaluation of several micro RNA (miRNA) levels in children and adolescents with attention deficit hyperactivity disorder. *Neurosci Lett.* 2014;580:158-62.
8. Dypås L, Gutzkow K, Olsen A-K, Duale N. Molecular Portrait of Potential Attention Deficit/ Hyperactivity Disorder Candidate Genes and Regulating Micrnas Expression in Normal Human Developing Brain Tissues. *Med Res Arch.* 2020;8(9).
9. Wang LJ, Li SC, Kuo HC, Chou WJ, Lee MJ, Chou MC, et al. Gray matter volume and microRNA levels in patients with attention-deficit/hyperactivity disorder. *Eur Arch Psychiatry Clin Neurosci.* 2019.

10. Coskun S, Karadag M, Gokcen C, Oztuzcu S. miR-132 and miR-942 Expression Levels in Children with Attention Deficit and Hyperactivity Disorder: A Controlled Study. *Clin Psychopharmacol Neurosci*. 2021;19(2):262-8.
11. Karadag M, Gokcen C, Nacarkahya G, Namiduru D, Dandil F, Calisgan B, et al. Chronotypical characteristics and related miR-142-3p levels of children with attention deficit and hyperactivity disorder. *Psychiatry Res*. 2019;273:235-9.
12. Nuzziello N, Craig F, Simone M, Consiglio A, Licciulli F, Margari L, et al. Integrated Analysis of microRNA and mRNA Expression Profiles: An Attempt to Disentangle the Complex Interaction Network in Attention Deficit Hyperactivity Disorder. *Brain Sci*. 2019;9(10).
13. Sanchez-Mora C, Soler Artigas M, Garcia-Martinez I, Pagerols M, Rovira P, Richarte V, et al. Epigenetic signature for attention-deficit/hyperactivity disorder: identification of miR-26b-5p, miR-185-5p, and miR-191-5p as potential biomarkers in peripheral blood mononuclear cells. *Neuropsychopharmacology : official publication of the American College of Neuropsychopharmacology*. 2018.
14. Garcia-Martinez I, Sanchez-Mora C, Pagerols M, Richarte V, Corrales M, Fadeuilhe C, et al. Preliminary evidence for association of genetic variants in pri-miR-34b/c and abnormal miR-34c expression with attention deficit and hyperactivity disorder. *Transl Psychiatry*. 2016;6(8):e879.
15. Zhu P, Pan J, Cai QQ, Zhang F, Peng M, Fan XL, et al. MicroRNA profile as potential molecular signature for attention deficit hyperactivity disorder in children. *Biomarkers*. 2022;27(3):230-9.
16. Gururajan A, Naughton ME, Scott KA, O'Connor RM, Moloney G, Clarke G, et al. MicroRNAs as biomarkers for major depression: a role for let-7b and let-7c. *Transl Psychiatry*. 2016;6(8):e862-e.
17. Mundalil Vasu M, Anitha A, Thanseem I, Suzuki K, Yamada K, Takahashi T, et al. Serum microRNA profiles in children with autism. *Mol Autism*. 2014;5(1):40.
18. Homorogan C, Enatescu VR, Nitusca D, Marcu A, Seclaman E, Marian C. Distribution of microRNAs associated with major depressive disorder among blood compartments. *J Int Med Res*. 2021;49(4):030006052110066.
19. Van Den Berg MMJ, Krauskopf J, Ramaekers JG, Kleinjans JCS, Prickaerts J, Briedé JJ. Circulating microRNAs as potential biomarkers for psychiatric and neurodegenerative disorders. *Prog Neurobiol*. 2020;185:101732.
20. Huang F, Long Z, Chen Z, Li J, Hu Z, Qiu R, et al. Investigation of Gene Regulatory Networks Associated with Autism Spectrum Disorder Based on MiRNA Expression in China. *PLoS One*. 2015;10(6):e0129052.
21. Hu Y, Ehli EA, Boomsma DI. MicroRNAs as biomarkers for psychiatric disorders with a focus on autism spectrum disorder: Current progress in genetic association studies, expression profiling, and translational research. *Autism Res*. 2017;10(7):1184-203.
22. Beveridge NJ, Cairns MJ. MicroRNA dysregulation in schizophrenia. *Neurobiol Dis*. 2012;46(2):263-71.
23. Camkurt MA, Karababa F, Erdal ME, Bayazit H, Kandemir SB, Ay ME, et al. Investigation of Dysregulation of Several MicroRNAs in Peripheral Blood of Schizophrenia Patients. *Clin Psychopharmacol Neurosci*. 2016;14(3):256-60.
24. Geaghan M, Cairns MJ. MicroRNA and Posttranscriptional Dysregulation in Psychiatry. *Biol Psychiatry*. 2015;78(4):231-9.
25. Camkurt MA, Karababa İF, Erdal ME, Kandemir SB, Fries GR, Bayazit H, et al. MicroRNA dysregulation in manic and euthymic patients with bipolar disorder. *J Affect Disord*. 2020;261:84-90.
26. Tonacci A, Bagnato G, Pandolfo G, Billeci L, Sansone F, Conte R, et al. MicroRNA Cross-Involvement in Autism Spectrum Disorders and Atopic Dermatitis: A Literature Review. *Journal of Clinical Medicine*. 2019;8(1):88.

27. Juvale IIA, Che Has AT. The Potential Role of miRNAs as Predictive Biomarkers in Neurodevelopmental Disorders. *J Mol Neurosci*. 2021.
28. Lee S-Y, Lu R-B, Wang L-J, Chang C-H, Lu T, Wang T-Y, et al. Serum miRNA as a possible biomarker in the diagnosis of bipolar II disorder. *Sci Rep*. 2020;10(1).
29. Mor M, Nardone S, Sams DS, Elliott E. Hypomethylation of miR-142 promoter and upregulation of microRNAs that target the oxytocin receptor gene in the autism prefrontal cortex. *Mol Autism*. 2015;6(1).
30. Levitskiy D, Confair A, Wagner KE, Devita S, Shea N, McKernan EP, et al. Longitudinal stability of salivary microRNA biomarkers in children and adolescents with autism spectrum disorder. *Res Autism Spectr Disord*. 2021;85:101788.
31. Beveridge NJ, Gardiner E, Carroll AP, Tooney PA, Cairns MJ. Schizophrenia is associated with an increase in cortical microRNA biogenesis. *Mol Psychiatry*. 2010;15(12):1176-89.
32. Ozkul Y, Taheri S, Bayram KK, Sener EF, Mehmetbeyoglu E, Öztop DB, et al. A heritable profile of six miRNAs in autistic patients and mouse models. *Sci Rep*. 2020;10(1).
33. Liu S, Zhang F, Wang X, Shugart YY, Zhao Y, Li X, et al. Diagnostic value of blood-derived microRNAs for schizophrenia: results of a meta-analysis and validation. *Sci Rep*. 2017;7(1).
34. Gou M, Pan S, Tong J, Zhou Y, Han J, Xie T, et al. Effects of microRNA-181b-5p on cognitive deficits in first-episode patients with schizophrenia: Mediated by BCL-2. *J Psychiatr Res*. 2021;136:358-65.
35. Moreau MP, Bruse SE, David-Rus R, Buyske S, Brzustowicz LM. Altered MicroRNA Expression Profiles in Postmortem Brain Samples from Individuals with Schizophrenia and Bipolar Disorder. *Biol Psychiatry*. 2011;69(2):188-93.
36. Marques FZ, Eikelis N, Bayles RG, Lambert EA, Straznicki NE, Hering D, et al. A polymorphism in the norepinephrine transporter gene is associated with affective and cardiovascular disease through a microRNA mechanism. *Mol Psychiatry*. 2017;22(1):134-41.
37. Horai T, Boku S, Okazaki S, Otsuka I, Ratta-Apha W, Mouri K, et al. miR-19b is elevated in peripheral blood of schizophrenic patients and attenuates proliferation of hippocampal neural progenitor cells. *J Psychiatr Res*. 2020;131:102-7.
38. Yoshino Y, Roy B, Dwivedi Y. Differential and unique patterns of synaptic miRNA expression in dorsolateral prefrontal cortex of depressed subjects. *Neuropsychopharmacology*. 2021;46(5):900-10.
39. Chen Y, Shi J, Liu H, Wang Q, Chen X, Tang H, et al. Plasma microRNA Array Analysis Identifies Overexpressed miR-19b-3p as a Biomarker of Bipolar Depression Distinguishing From Unipolar Depression. *Front Psychiatry*. 2020;11(757).
40. Ragusa M, Santagati M, Mirabella F, Laretta G, Cirnigliaro M, Brex D, et al. Potential Associations Among Alteration of Salivary miRNAs, Saliva Microbiome Structure, and Cognitive Impairments in Autistic Children. *Int J Mol Sci*. 2020;21(17):6203.
41. Perkins DO, Jeffries CD, Jarskog LF, Thomson JM, Woods K, Newman MA, et al. microRNA expression in the prefrontal cortex of individuals with schizophrenia and schizoaffective disorder. *Genome Biol*. 2007;8(2):R27.
42. Shi W, Du J, Qi Y, Liang G, Wang T, Li S, et al. Aberrant expression of serum miRNAs in schizophrenia. *J Psychiatr Res*. 2012;46(2):198-204.
43. Ma J, Shang S, Wang J, Zhang T, Nie F, Song X, et al. Identification of miR-22-3p, miR-92a-3p, and miR-137 in peripheral blood as biomarker for schizophrenia. *Psychiatry Res*. 2018;265:70-6.
